# Supplementary material for: Genetically similar strains of Escherichia coli O157:H7 isolated from sheep, cattle and human patients
Source: PubMed Central journal article supplement (PMC3514354; doi:10.1186/1746-6148-8-200), 2012-10-24
Supplement: 1746-6148-8-200-S1.pdf [file 1746-6148-8-200-S1.pdf]

## Supplementary file 1

Age distribution of sampled animals and geographic locations of slaughterhouses included in the study

| Slaughterhouse location | Tot. samples taken / no. positive | < 6 months old / no. positive | > 6 months old / no. positive |
|-------------------------|-----------------------------------|-------------------------------|-------------------------------|
| Skellefteå (Ske)        | 16 / 0                            | 14 / 0                        | 2 / 0                         |
| Ullånger (Ull)          | 14 / 0                            | 12 / 0                        | 2 / 0                         |
| Ickholmen (I)           | 6 / 0                             | 6 / 0                         | 0 / 0                         |
| Bäsinge (B)             | 28 / 0                            | 21 / 0                        | 7 / 0                         |
| Uppsala (Upp)           | 35 / 0                            | 33 / 0                        | 2 / 0                         |
| Linköping (L)           | 198 / 5                           | 170 / 5                       | 28 / 0                        |
| Skara (S)               | 158 / 3                           | 127 / 3                       | 31 / 0                        |
| Visby (V)               | 89 / 2                            | 80 / 2                        | 9 / 0                         |
| Kävlinge (K)            | 53 / 1                            | 44 / 1                        | 9 / 0                         |
| <b>Total</b>            | <b>597 / 11</b>                   | <b>507 / 11</b>               | <b>90 / 0</b>                 |

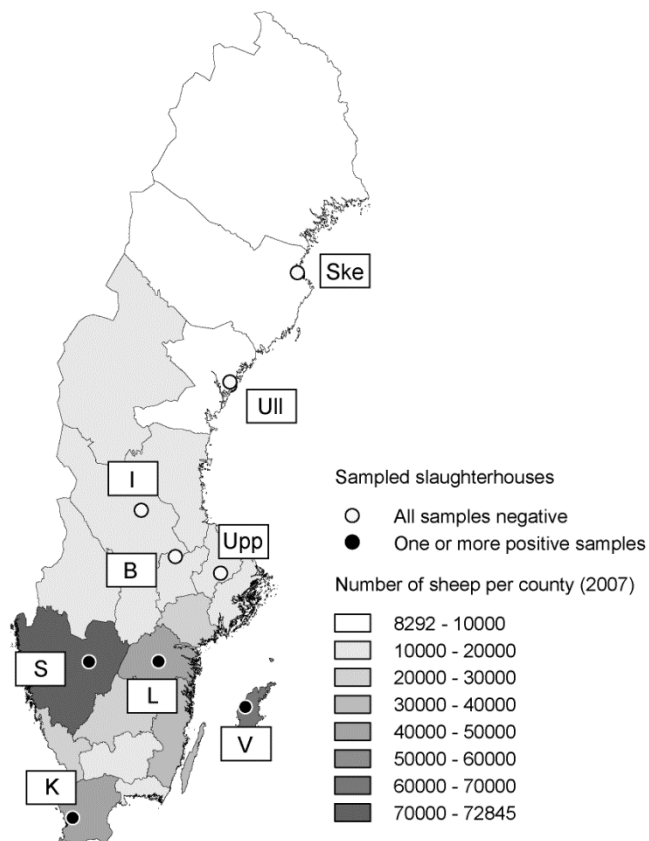

Map created in Quantum GIS 1.7.3 with administrative boundaries at county level from the GADM database ([www.gadm.org](http://www.gadm.org)), version 2.0. For comparison, total number of sheep per county, data from Yearbook of Agricultural Statistics 2008, Swedish Board of Agriculture. (<http://www.sjv.se/amnesomraden/statistik/ja.4.7502f61001ea08a0c7fff104195.html>)
