# Supplementary material for: Genetically similar strains of Escherichia coli O157:H7 isolated from sheep, cattle and human patients
Source: PubMed Central journal article supplement (PMC3514354; doi:10.1186/1746-6148-8-200), 2012-10-24
Supplement: 1746-6148-8-200-S2.pdf [file 1746-6148-8-200-S2.pdf]

## Supplementary file 2

### Clustering and comparison of isolates based on PFGE

PFGE comparison, human and sheep isolates

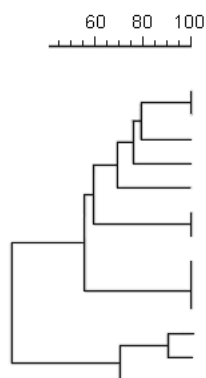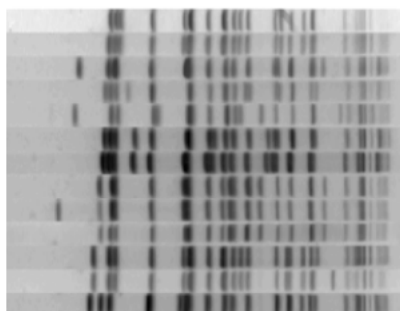

| Isolate (PFGE profile) | Source | MLVA               |
|------------------------|--------|--------------------|
| E162/08                | Human  | 19-8-14-3-9-7-5-10 |
| 07-BKT34471 (K)        | Sheep  | 15-8-14-3-9-7-5-10 |
| 08-BKT5515 (La)        | Sheep  | 5-7-14-4-6-6-NA-5  |
| 08-BKT36780 (Sa)       | Sheep  | 5-7-12-4-6-6-7-5   |
| 08-BKT8080 (Lb)        | Sheep  | 4-7-NA-5-3-9-5-8   |
| 08-BKT42292 (Sb1)      | Sheep  | 5-7-13-4-9-6-7-5   |
| 08-BKT42293 (Sb2)      | Sheep  | 5-7-13-4-9-6-7-5   |
| 08-BKT45237 (Ld1)      | Sheep  | 14-7-11-3-4-5-9-6  |
| 08-BKT45241 (Ld2)      | Sheep  | 14-7-11-3-4-5-9-6  |
| E91/03                 | Human  | 14-6-6-3-4-5-5-8   |
| 08-BKT39835 (Va)       | Sheep  | NA-7-16-5-9-6-5-11 |
| 07-BKT35158 (Vb)       | Sheep  | NA-7-15-5-9-6-5-11 |
| 08-BKT45239 (Lc)       | Sheep  | 17-7-20-4-4-7-8-5  |

Optimization 3%, band match tolerance 1%. Ward clustering based on Dice similarity index

PFGE comparison, cattle and sheep isolates

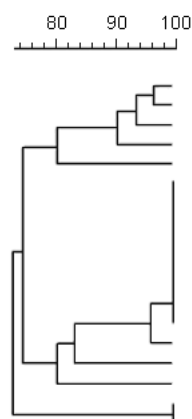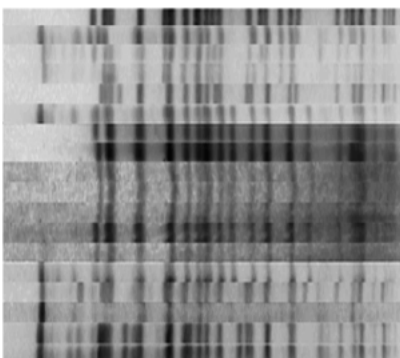

| Isolate (PFGE profile) | Source | MLVA               |
|------------------------|--------|--------------------|
| 08-BKT39835 (Va)       | Sheep  | NA-7-16-5-9-6-5-11 |
| 08-BKT45239 (Lc)       | Sheep  | 17-7-20-4-4-7-8-5  |
| 07-BKT35158 (Vb)       | Sheep  | NA-7-15-5-9-6-5-11 |
| 07-BKT34471 (K)        | Sheep  | 15-8-14-3-9-7-5-10 |
| 08-BKT36780 (Sa)       | Sheep  | 5-7-12-4-6-6-7-5   |
| 08-BKT45237 (Ld1)      | Sheep  | 14-7-11-3-4-5-9-6  |
| T158/05                | Cattle | 19-7-12-3-4-5-8-7  |
| T174/05                | Cattle | 16-8-11-3-4-5-6-6  |
| T304/05                | Cattle | 18-8-11-4-4-5-5-6  |
| T306/05                | Cattle | 17-8-11-3-4-5-7-6  |
| T307/05                | Cattle | 15-7-14-5-4-5-6-6  |
| T408/05                | Cattle | 19-7-11-3-4-5-7-7  |
| T409/05                | Cattle | 19-7-11-3-4-5-7-7  |
| 08-BKT45241 (Ld2)      | Sheep  | 14-7-11-3-4-5-9-6  |
| 08-BKT5515 (La)        | Sheep  | 5-7-14-4-6-6-NA-5  |
| 08-BKT8080 (Lb)        | Sheep  | 4-7-NA-5-3-9-5-8   |
| 08-BKT42292 (Sb1)      | Sheep  | 5-7-13-4-9-6-7-5   |
| 08-BKT42293 (Sb2)      | Sheep  | 5-7-13-4-9-6-7-5   |

Optimization 0.5%, band match tolerance 1.2%. UPGMA clustering based on Dice similarity index
